# Supplementary material for: A magnetic/fluorometric bimodal sensor based on a carbon dots–MnO2platform for glutathione detection
Source: Royal Society of Chemistry journal article supplement (doi:10.1039/c6nr03129c), 2016-01-01
Supplement: c6nr03129c1.pdf [file c6nr03129c1.pdf]

## Supporting Information for

### **A magnetic/fluorometric bimodal sensor based on carbon dots-MnO<sub>2</sub> platform for glutathione detection**

Yang Xu,<sup>a</sup> Xi Chen,<sup>a</sup> Ran Chai,<sup>b</sup> Chengfen Xing,<sup>b</sup> Huanrong Li<sup>\*a</sup> and Xue-bo Yin <sup>\*c</sup>

<sup>a</sup> School of Chemical Engineering and Technology, Hebei University of Technology, GuangRong Dao 8, Hongqiao District, Tianjin 300130, China. Email: lihuanrong@hebut.edu.cn;

<sup>b</sup> Key Laboratory of Hebei Province for Molecular Biophysics, Institute of Biophysics, Hebei University of Technology, Tianjin 300130, China.

<sup>c</sup> State Key Laboratory of Medicinal Chemical Biology, Collaborative Innovation Center of Chemical Science and Engineering(Tianjin), and Research Center for Analytical Sciences, College of Chemistry, Nankai University, Tianjin, 300071, China. Email: xbyin@nankai.edu.cn

## Results and discussions

**Table S1.** The zeta-potentials of MnO<sub>2</sub> and CDs.

| Materials         | $\xi$ -potential |
|-------------------|------------------|
| MnO <sub>2</sub>  | −19.7 mV         |
| pCDs              | +5.58 mV         |
| bCDs              | −22.5 mV         |
| <sup>13</sup> CDs | −32.2 mV         |
| yCDs              | +8.49 mV         |

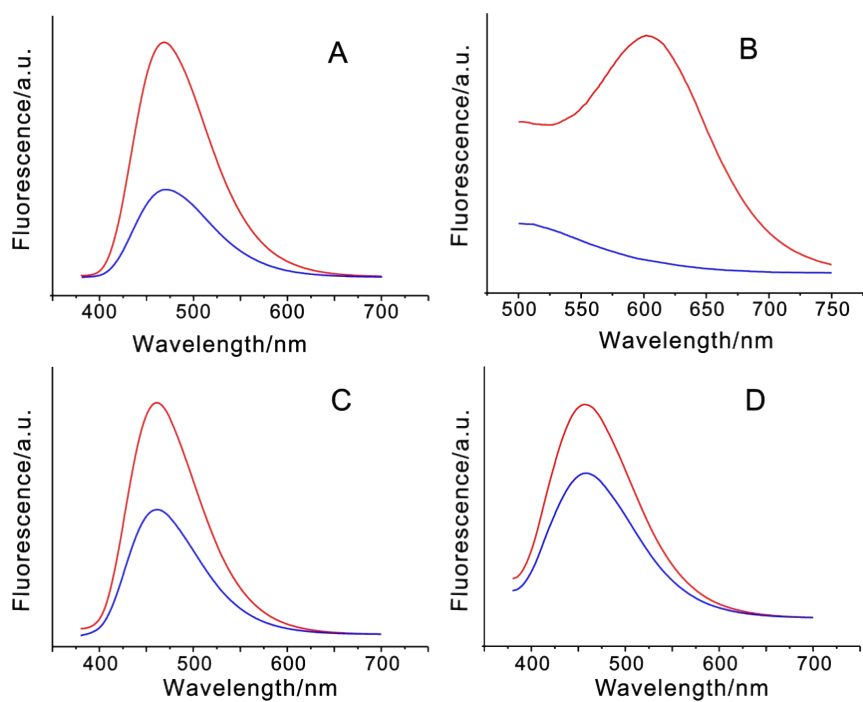

**Figure S1.** The fluorescence spectra of CDs (red lines), and CDs-MnO<sub>2</sub> (blue lines): (A) pCDs; (B) yCDs; (C) bCDs; (D) <sup>13</sup>CDs.

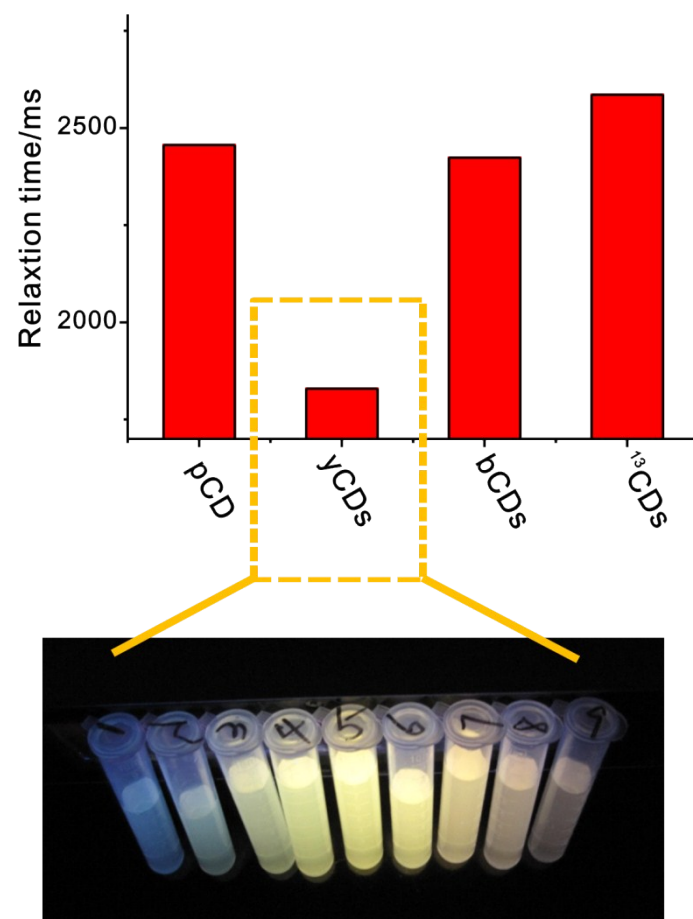

**Figure S2.** The longitudinal relaxation time of different kinds of CDs-MnO<sub>2</sub> platform. The fluorescent images of nine fractions separated from yCDs upon UV light excitation.

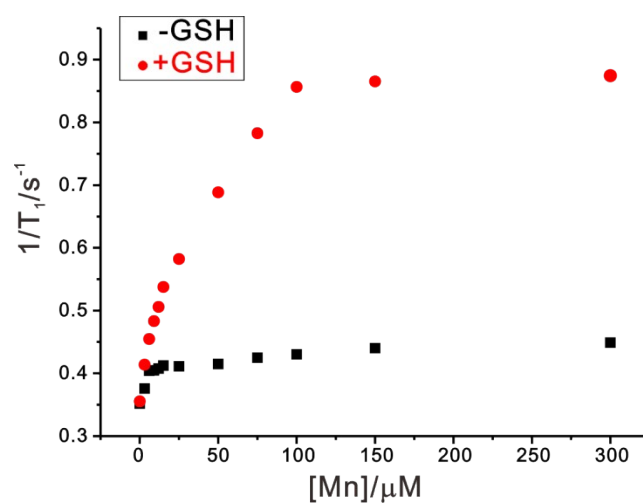

**Figure S3.** The  $1/T_1$  versus  $MnO_2$  concentration curves of pCDs- $MnO_2$  solution in the absence and presence of GSH.

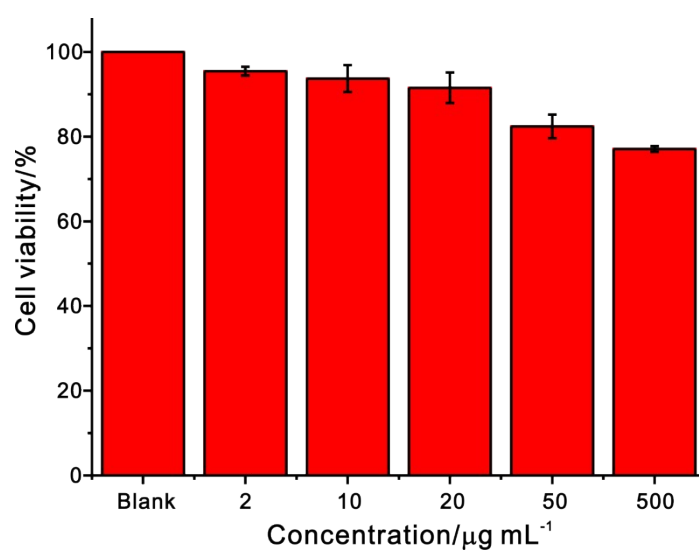

**Figure S4.** Cell viability of HeLa cells incubated with pCD- $MnO_2$ . Data were presented as the mean  $\pm$  the standard deviation (SD).

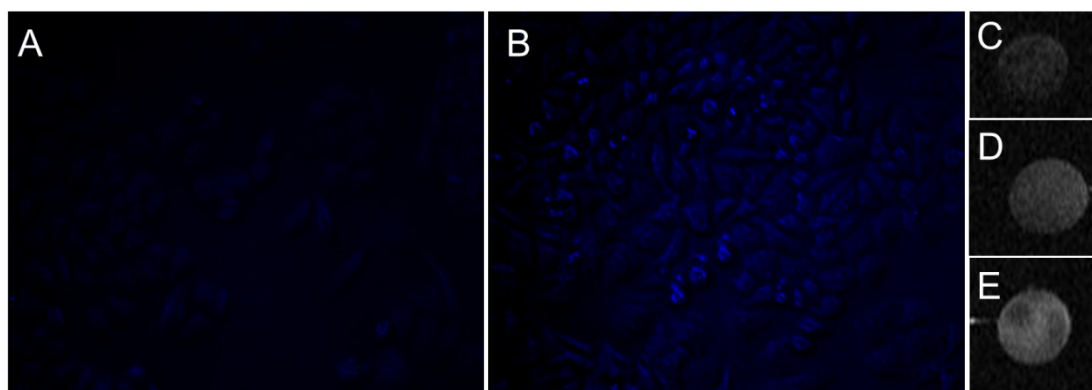

**Figure S5.** The fluorescence images of (A) HeLa cells and (B) HeLa cells incubated with pCDs-MnO<sub>2</sub> (50 µg mL<sup>-1</sup>) for 4 h. Fluorescence images acquired with 325-375 nm excitation and 435-485 nm emission. (C) The MR images of pCD-MnO<sub>2</sub> solution. The MR images of cell lysis solution: (D) HeLa cells and (E) MCF-7 cells incubated with pCDs-MnO<sub>2</sub>.

Table S2. The GSH concentrations of HeLa cells and MCF-7 cells measured by GSH commercial assay kit and pCDs-MnO<sub>2</sub>. The cell lysis solutions were diluted by 20 times.

|             | GSH commercial<br>assay kit (µM) | pCDs-MnO <sub>2</sub> in<br>fluorescence mode<br>(µM) | pCDs-MnO <sub>2</sub> in MR<br>mode (µM) |
|-------------|----------------------------------|-------------------------------------------------------|------------------------------------------|
| HeLa cells  | 6.4                              | 7.9                                                   | 9.5                                      |
| MCF-7 cells | 7.6                              | 8.8                                                   | 11                                       |
